# Supplementary material for: Facile catalyst-free synthesis, exchanging, and hydrolysis of an acetal motif for dynamic covalent networks
Source: Royal Society of Chemistry journal article supplement (doi:10.1039/c9ta04073k), 2019-01-01
Supplement: c9ta04073k1.pdf [file c9ta04073k1.pdf]

## Facile Catalyst-free Synthesis, Exchanging, Hydrolysis of Acetal Motif for Dynamic Covalent Networks

Qiong Li<sup>†‡</sup>, Songqi Ma<sup>†\*</sup>, Sheng Wang<sup>†‡</sup>, Wangchao Yuan<sup>†‡</sup>, Xiwei Xu<sup>†</sup>, Binbo Wang<sup>†</sup>, Kaifeng Huang<sup>†</sup>, Jin Zhu<sup>†\*</sup>

<sup>†</sup> Key Laboratory of Bio-based Polymeric Materials Technology and Application of Zhejiang Province, Ningbo Institute of Materials Technology and Engineering, Chinese Academy of Sciences, Ningbo 315201, P. R. China;

<sup>‡</sup> University of Chinese Academy of Sciences, Beijing 100049, P. R. China;

\*Corresponding authors: (Songqi Ma) E-mail [masongqi@nimte.ac.cn](mailto:masongqi@nimte.ac.cn), Tel 86-0574-87619806;  
(Jin Zhu) E-mail [jzhu@nimte.ac.cn](mailto:jzhu@nimte.ac.cn).

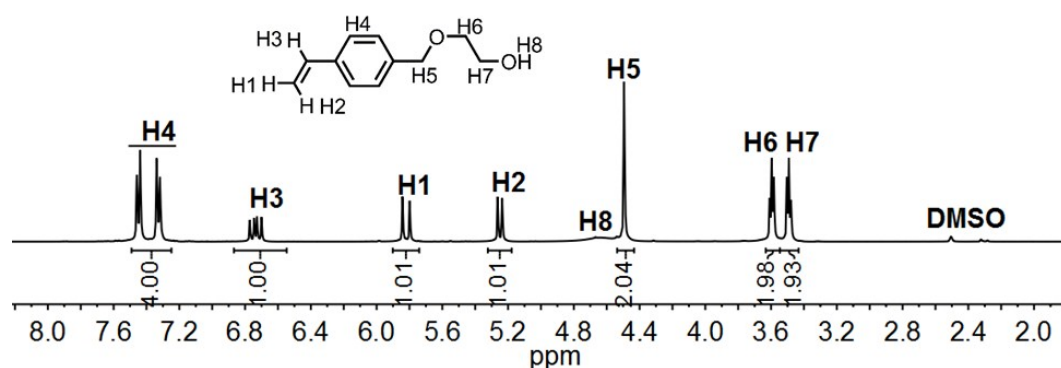

Fig. S1 <sup>1</sup>H NMR spectrum of 2-(4-vinyl-benzyloxy)-ethanol (1).

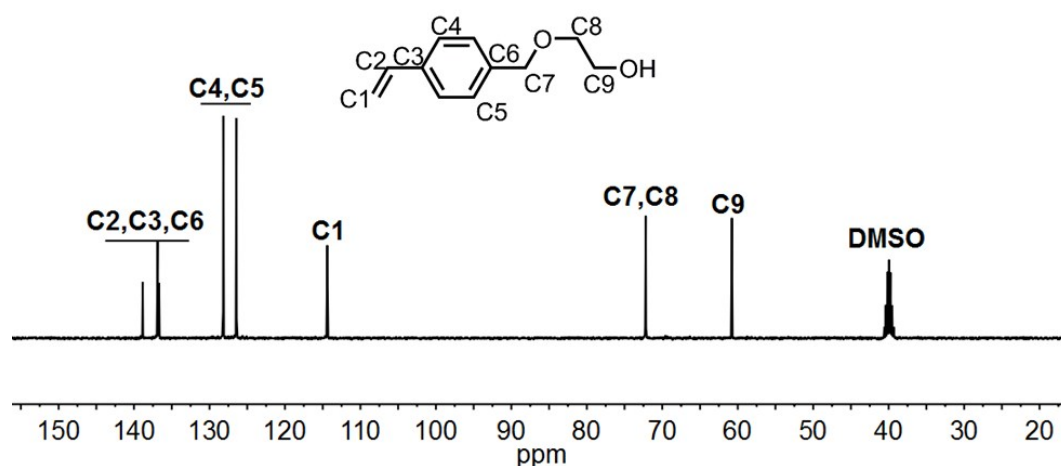

Fig. S2 <sup>13</sup>C NMR spectrum of 2-(4-vinyl-benzyloxy)-ethanol (1).

Calculated theoretical element contents for C<sub>10</sub>H<sub>14</sub>O<sub>2</sub> (%): C, 74.16; H, 7.86; O, 17.98.

Measured element contents for C<sub>10</sub>H<sub>14</sub>O<sub>2</sub> (%): C, 74.85, 74.76; H, 7.48, 8.16; O, 17.64, 18.09.

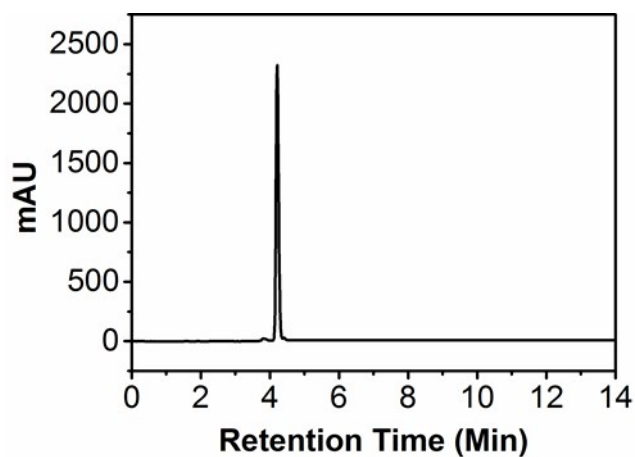

Fig. S3 HPLC spectrum of compound 1. Purity is 97.2%.

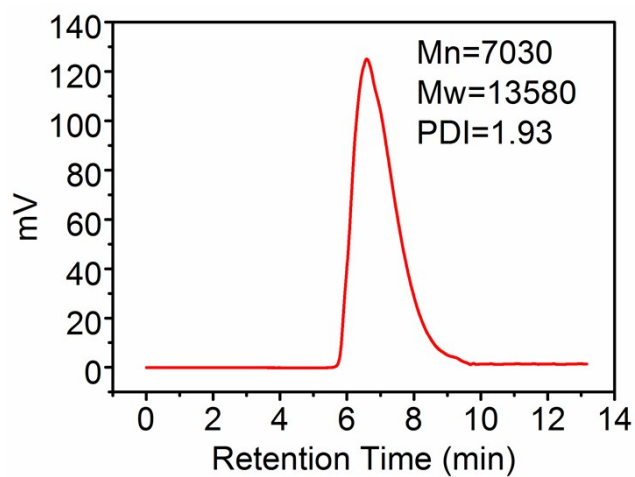

Fig. S4 GPC curves of PSS-OH in THF.

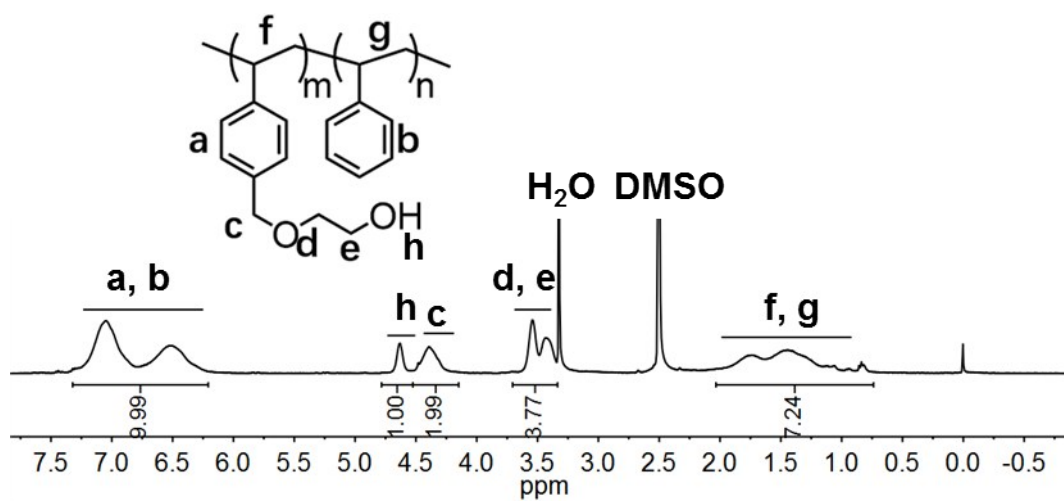

Fig. S5  $^1\text{H}$  NMR spectrum of poly (styrene-co-styrene-OH) (PSS-OH).

The molar proportion of **1** in PSS-OH was calculated from the integral area of protons c (1.99)

and protons a and b (9.99) in the  $^1\text{H}$  NMR spectrum of PSS-OH (Fig. S5).

$$\text{The molar proportion of 1} = \frac{1.99/2}{\frac{1.99}{2} + \frac{9.99 - 1.99 \times 2}{5}} \times 100\% = 45\%$$

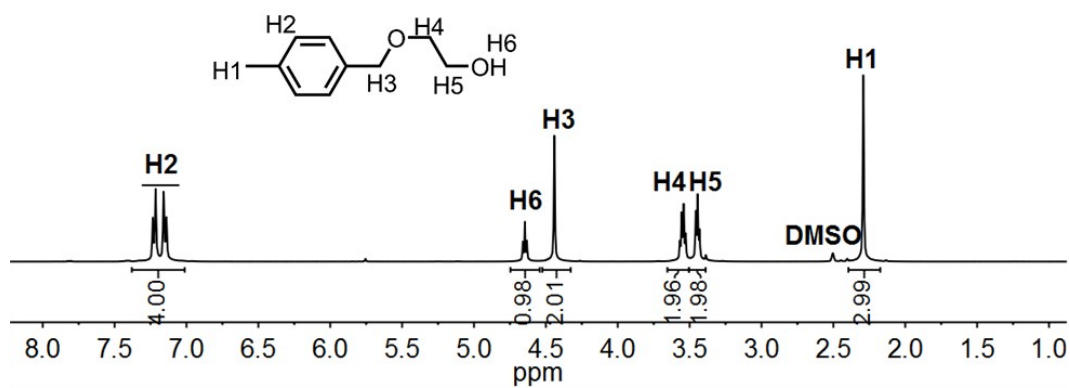

Fig. S6  $^1\text{H}$  NMR spectrum of 2-(4-methylbenzyloxy) ethanol (2).

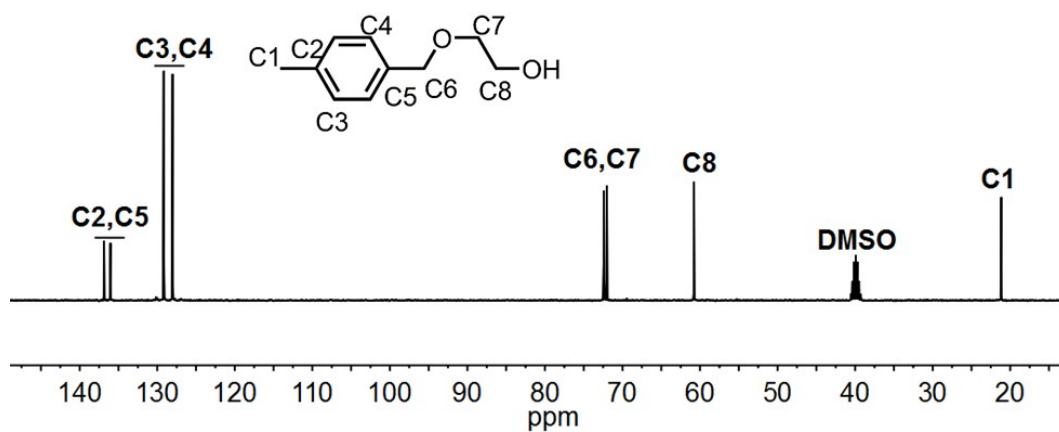

Fig. S7  $^{13}\text{C}$  NMR spectrum of 2-(4-methylbenzyloxy) ethanol (2).

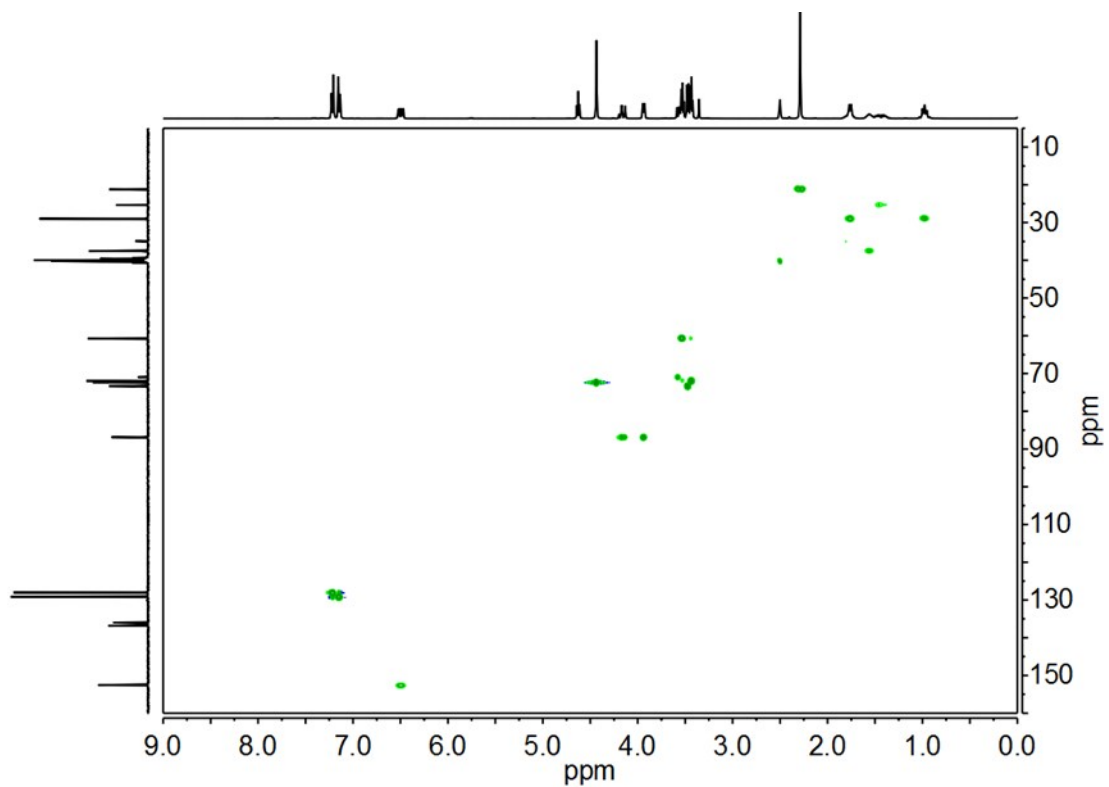

**Fig. S8**  $^{13}\text{C}$ - $^1\text{H}$ -COSY HMQC of ac alcohol **2** and CVDE at 25 °C.

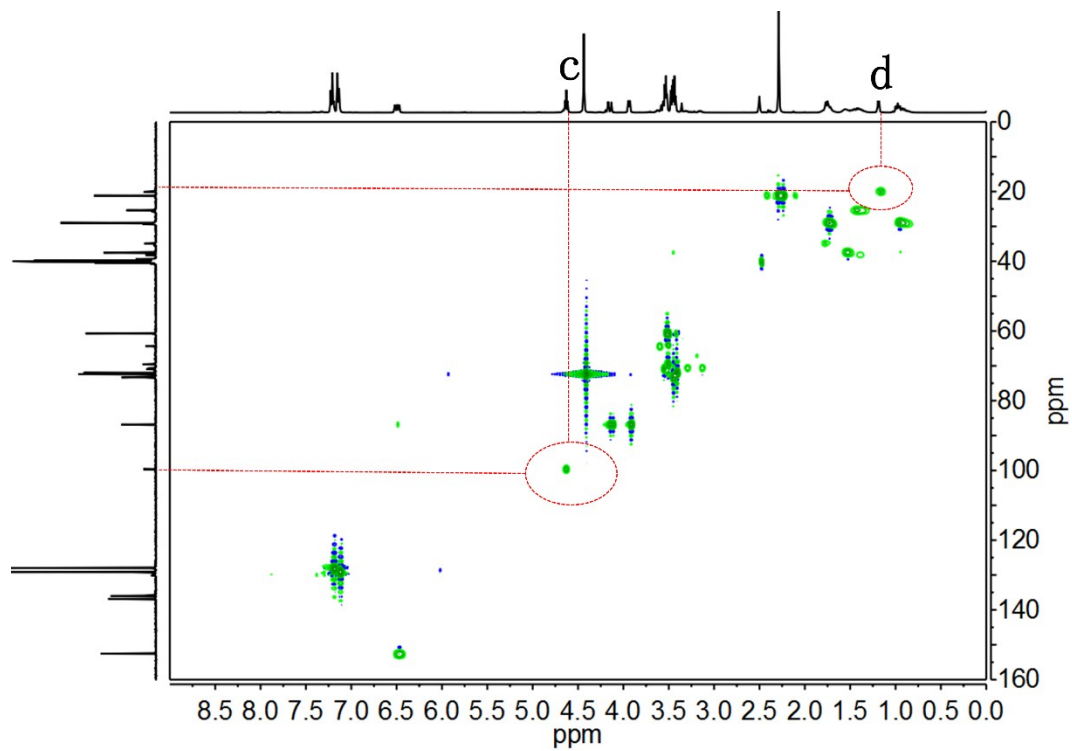

**Fig. S9**  $^{13}\text{C}$ - $^1\text{H}$ -COSY HMQC of ac alcohol **2** and CVDE at 80 °C.

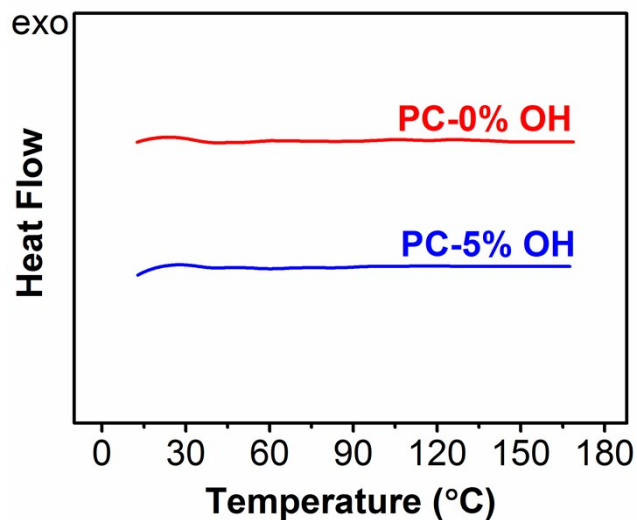

Fig. S10 Non-isothermal DSC curves of the acetal dynamic networks.

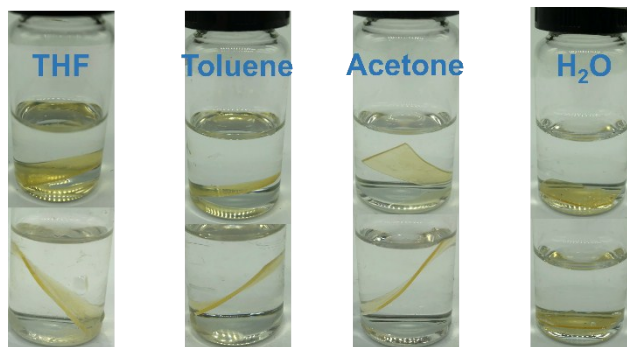

Fig. S11 The images of PC-5% OH before and after immersing in 40 °C THF, acetone, toluene for 12 h and H<sub>2</sub>O for 2h.

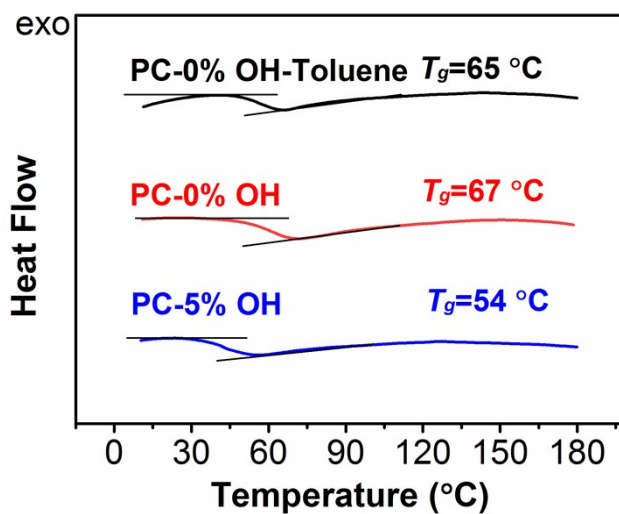

Fig. S12 DSC curves of the acetal dynamic networks PC-0% OH, PC-5% OH and PC-0% OH-Toluene (prepared with the help of toluene).

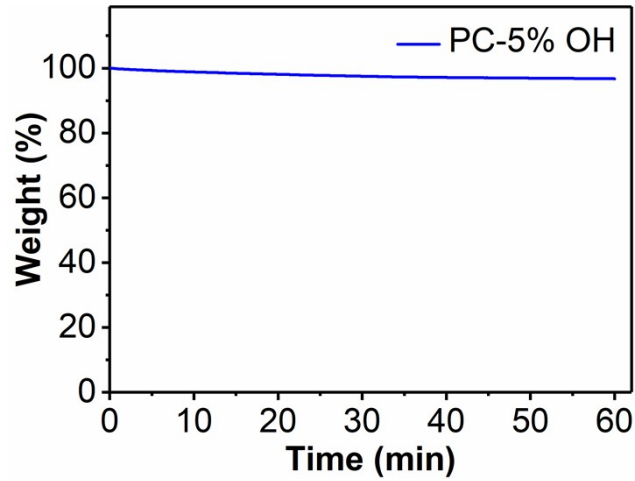

Fig. S13 Isothermal TGA curves of PC-5% OH at 180 °C under nitrogen.

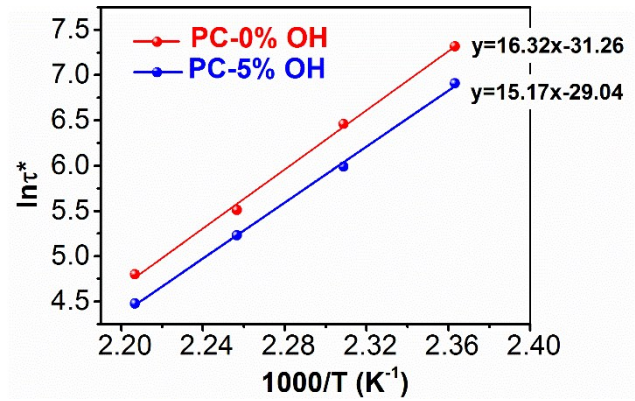

Fig. S14 Arrhenius plots of the measured relaxation times.

### Calculation of topology-freezing temperatures ( $T_v$ ) and activation energies ( $E_a$ )<sup>1</sup>

Topology-freezing temperatures ( $T_v$ ) and activation energies ( $E_a$ ) were determined using the methodology reported in literature<sup>2</sup>. The measured values of characteristic relaxation times ( $\tau^*$ s) were plotted versus  $1000/T$ . The plots were fit to the Arrhenius law in equation (1)

$$\tau^*(T) = \tau_0^* e^{\frac{E_a}{RT}} \quad (1)$$

( $R$  : universal gas constant;  $8.314 \text{ J K}^{-1} \text{ mol}^{-1}$ )

Equation (2) can be transformed to equation (2) (Fig. S9):

$$\ln \tau^*(T) = \ln \tau_0^* + \frac{E_a}{RT} \quad (2)$$

PC-0% OH:  $\ln \tau^*(T) = 16.32 \times \frac{1000}{T} - 31.26$  (3)  $E_a/R=16.32$   $E_a=136 \text{ kJ mol}^{-1}$

$$\text{PC-5\% OH: } \ln \tau^* (T) = 15.17 \times \frac{1000}{T} - 29.04 \quad (4) \quad E_a/R=15.17 \quad E_a=126 \text{ kJ mol}^{-1}$$

$T_v$  is defined to be the temperature at which the material reaches a viscosity of  $10^{12}$  Pa. The relation of the viscosity  $\eta$  and the  $\tau^*$  is known as the Maxwell relation (equation (5))

$$\eta = G \times \tau^* = (E'/2 (1 + \nu)) \times \tau^* \quad (5)$$

( $G$  : shear modulus,  $E'$  : storage modulus,  $\nu$  : Poisson's ratio)

Using the Poisson's ratio ( $\nu$ ) of polystyrene (0.336),

$$\eta = 0.374 \times E' \times \tau^* \quad (6)$$

The storage modulus of PC-0% OH from 150 °C to 180 °C is 8.5 MPa, and that of PC-5% OH in the same temperature range is 7.1 MPa (Fig. 5). Because  $\eta$  is  $10^{12}$  Pa at  $T_v$ ,  $\tau^*$ s at  $T_v$  of PC-0% OH and PC-5% OH are calculated to be  $3.1 \times 10^5$  s and  $3.8 \times 10^5$  s, respectively. Using these values and equation (3) and (4),  $T_v$  was computed to be 99 °C for PC-0% OH and 89 °C for PC-5% OH.

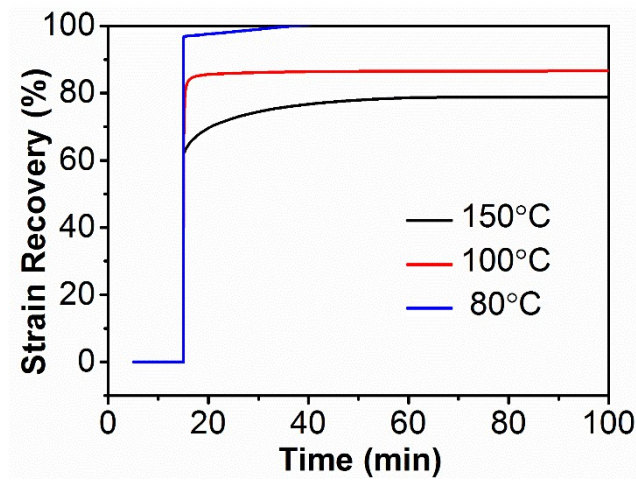

**Fig. S15** Strain recovery as a function of time from creep tests for PC-5% OH under 0.2 MPa stress at different temperatures.

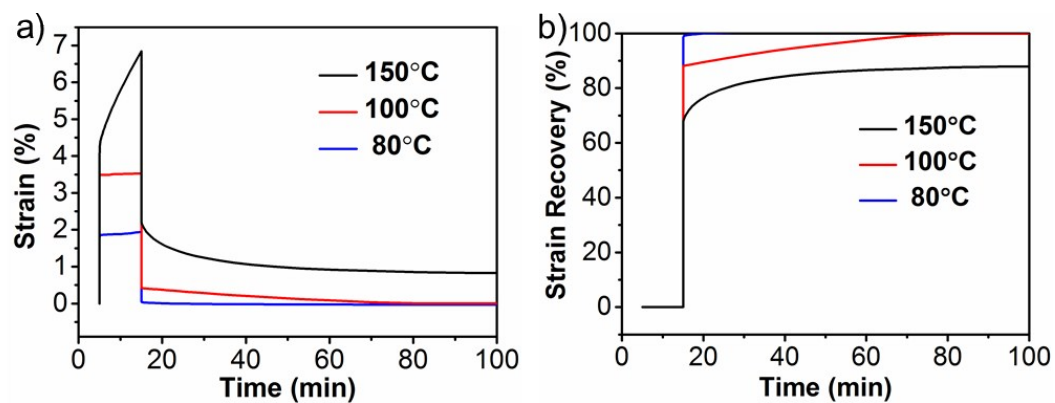

**Fig. S16** a) Creep curves of PC-0% OH. b) Strain recovery as a function of time from creep tests for PC-0% OH under 0.2 MPa stress at different temperatures.

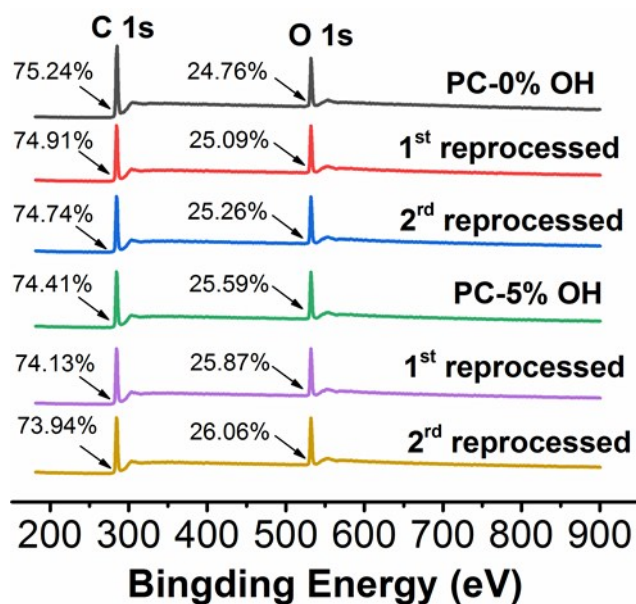

**Fig. S17** XPS spectra of original and reprocessed samples.



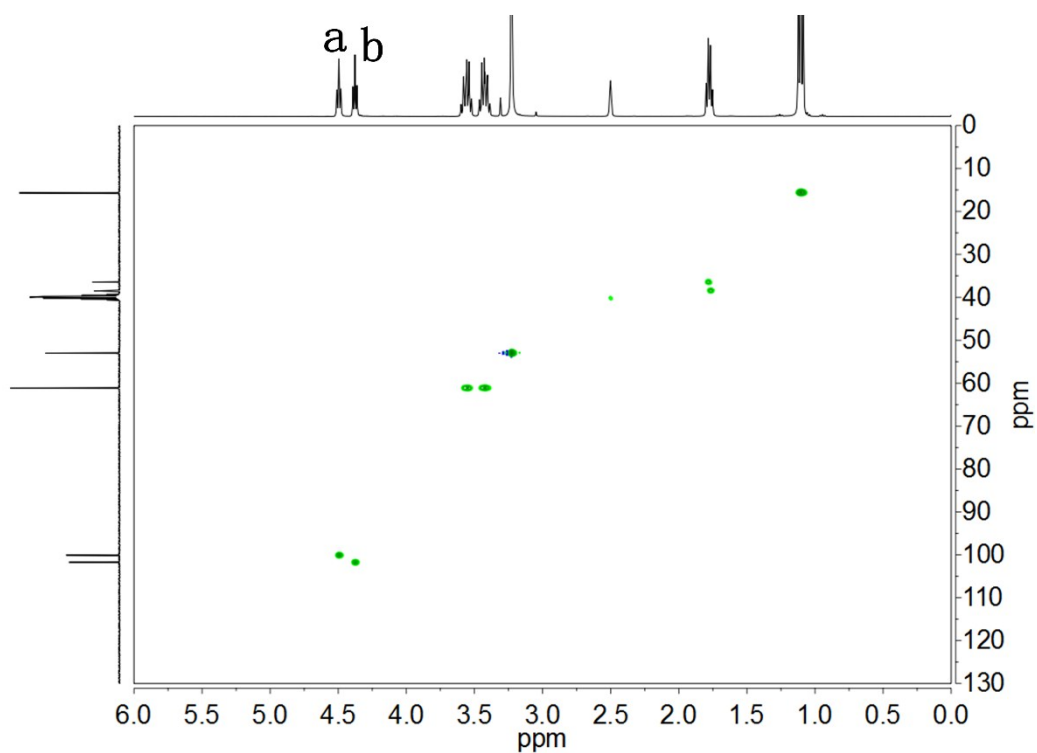

**Fig. S18**  $^{13}\text{C}$ - $^1\text{H}$ -COSY HMQC of acetal **3** and **4** at 150 °C for 0 min.

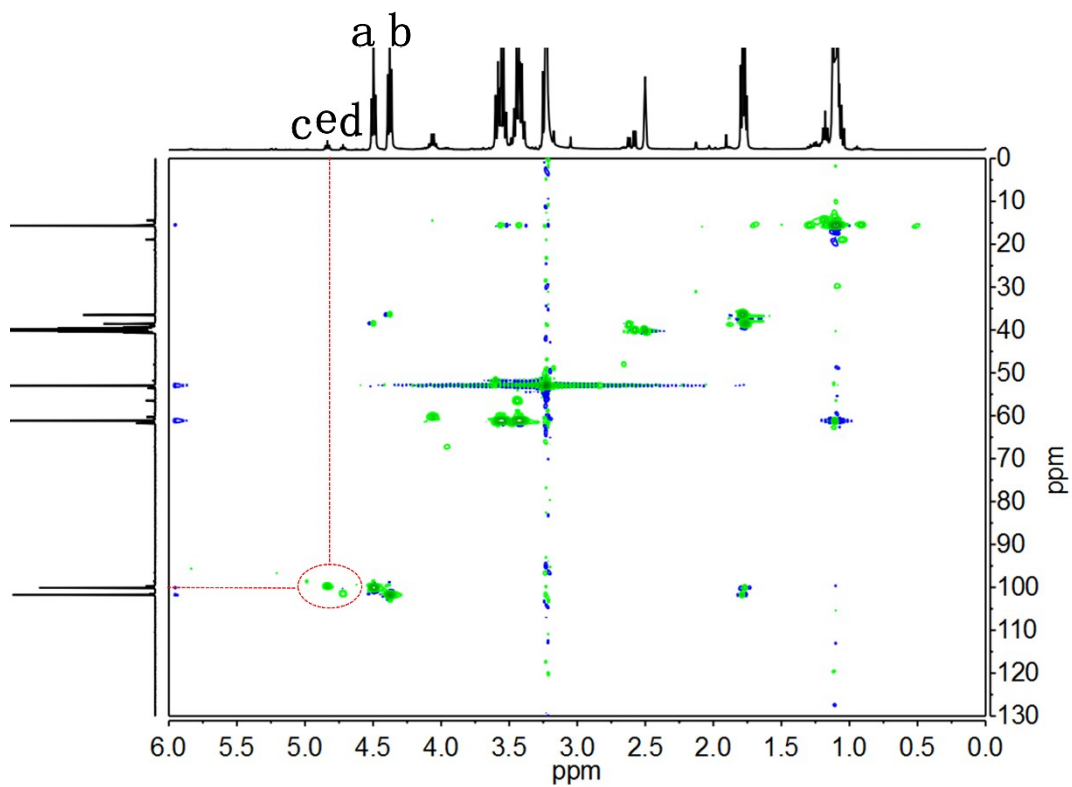

**Fig. S19**  $^{13}\text{C}$ - $^1\text{H}$ -COSY HMQC of acetal **3** and **4** at 150 °C for 8 h.

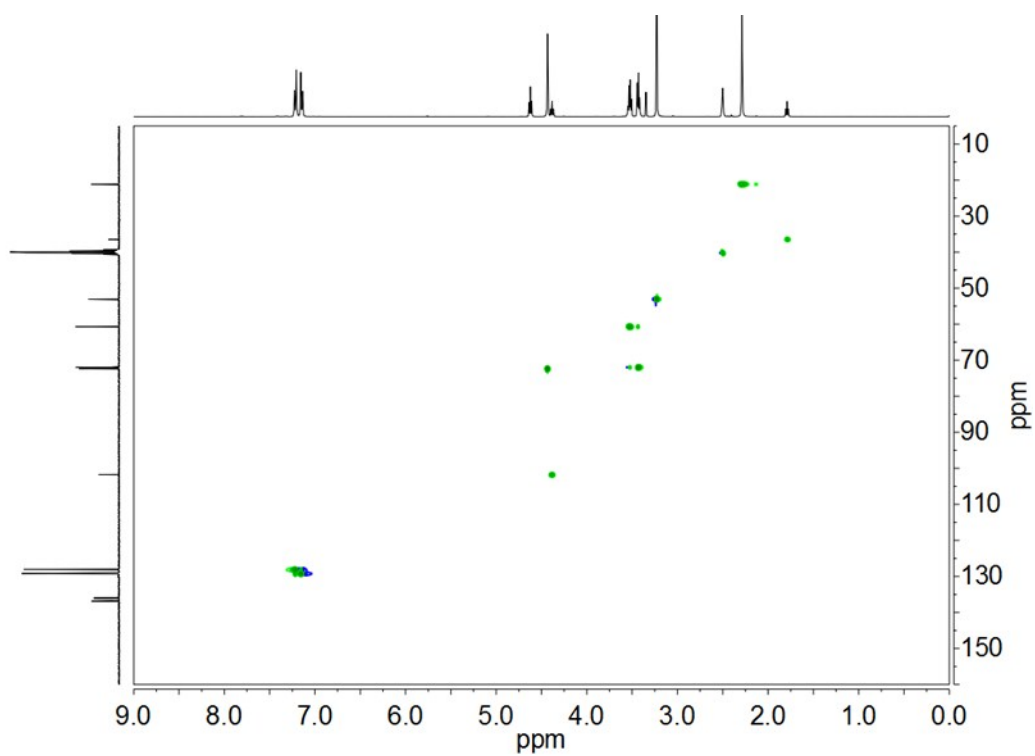

**Fig. S20**  $^{13}\text{C}$ - $^1\text{H}$ -COSY HMQC of alcohol **2** and acetal **4** at 150 °C for 0 min.

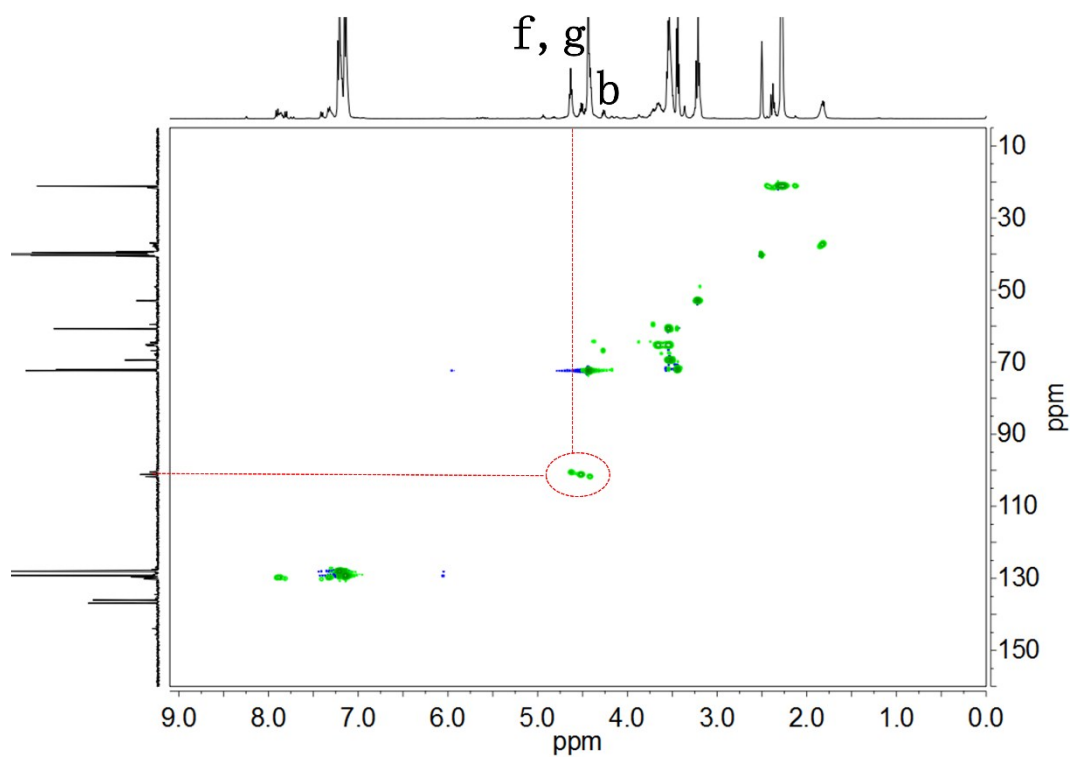

**Fig. S21**  $^{13}\text{C}$ - $^1\text{H}$ -COSY HMQC of alcohol **2** and acetal **4** at 150 °C for 8 h.

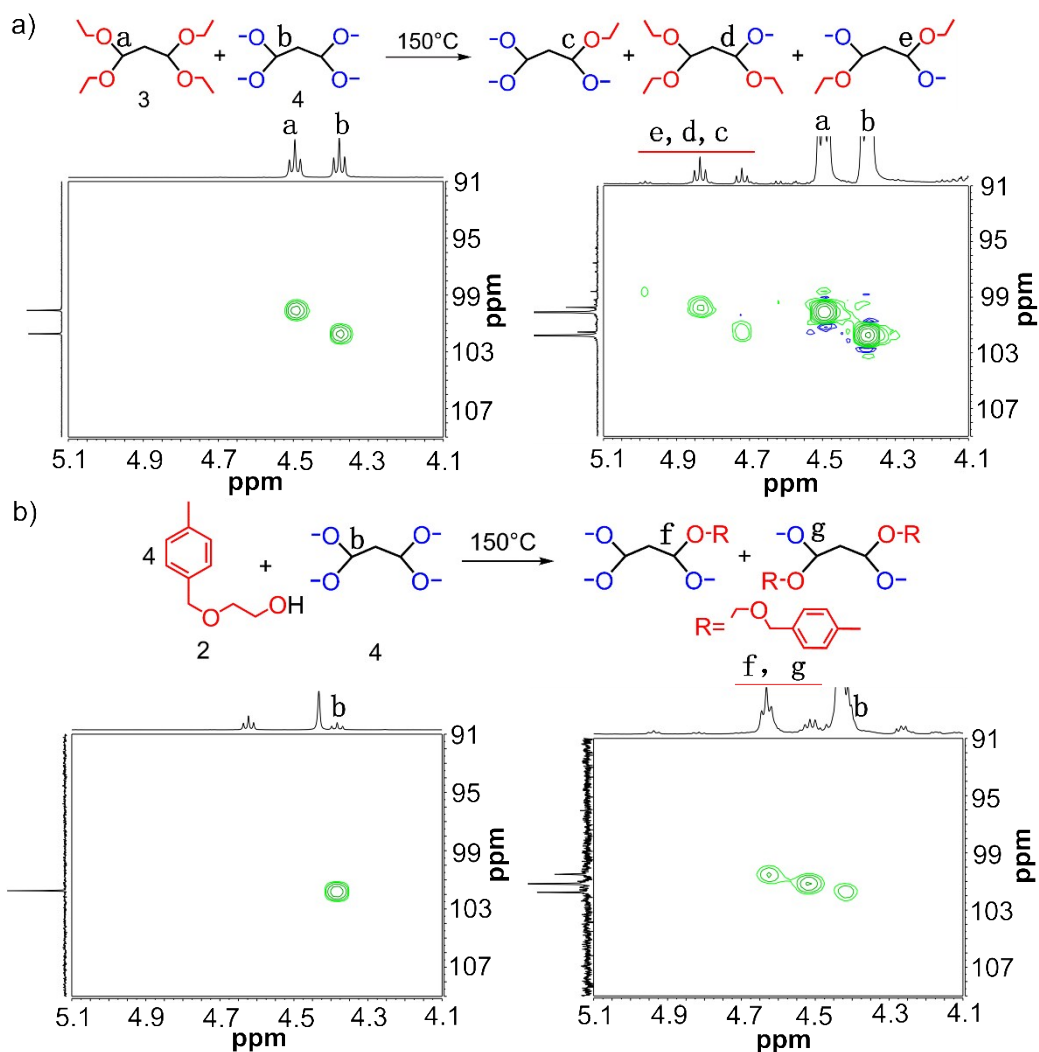

**Fig. S22** Catalyst-free acetal exchange mechanism: a) metathesis of acetal and the  $^1\text{H}$  NMR spectra of the reaction system at 150 °C for different times; b) transacetalation and the  $^1\text{H}$  NMR spectra of the reaction system at 150 °C for different times.

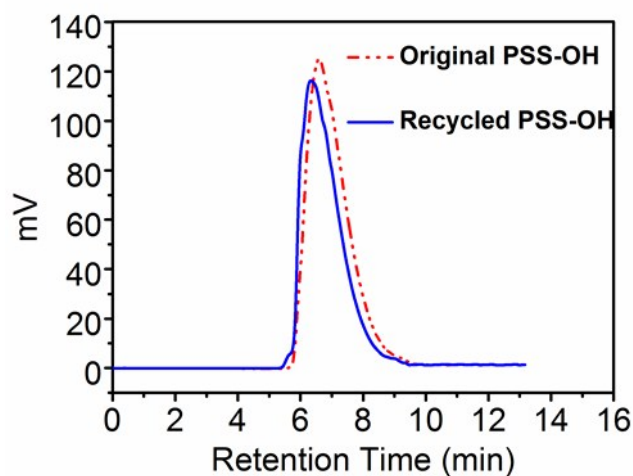

**Fig. S23** GPC curves of recycled and original PSS-OH in THF.

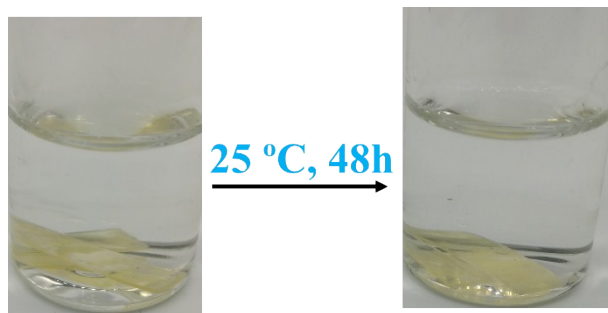

**Fig. S24** The images of PC-0% OH before and after immersing in 25 °C water for 48 h.

**Table S1.** Swelling degree of PC-5% OH at 40 °C in THF, acetone, toluene for 12 h and H<sub>2</sub>O for 2 h.

|                  | $m_0$ (mg) | $m_1$ (mg) | Swelling degree (%) |
|------------------|------------|------------|---------------------|
| THF              | 123.2      | 216.8      | 176                 |
| Toluene          | 83.6       | 133.7      | 160                 |
| Acetone          | 71.9       | 105.6      | 147                 |
| H <sub>2</sub> O | 83.7       | 90.4       | 108                 |

**Table S2.** Gel content of the acetal networks.

|          | $m_0$ (mg) | $m_1$ (mg) | Gel content (%) |
|----------|------------|------------|-----------------|
| PC-0% OH | 212.5      | 206.2      | 97              |
| PC-5% OH | 207.3      | 199.2      | 96              |

**Table S3.** Mechanical properties of the original and reprocessed acetal networks.

| Sample   |                             | Tensile strength (MPa) | Young's modulus (MPa) | Elongation at break(%) |
|----------|-----------------------------|------------------------|-----------------------|------------------------|
| PC-0% OH | original                    | 33.3±2.1               | 1109±113              | 5.3±0.9                |
|          | 1 <sup>st</sup> reprocessed | 32.0±1.2               | 1009±76               | 4.4±1.1                |
|          | 2 <sup>nd</sup> reprocessed | 29.7±1.9               | 968±89                | 4.5±0.3                |
| PC-5% OH | original                    | 28.8±1.9               | 1046±54               | 4.4±0.7                |
|          | 1 <sup>st</sup> reprocessed | 29.2±2.7               | 871±67                | 5.0±0.9                |
|          | 2 <sup>nd</sup> reprocessed | 27.2±1.6               | 879±71                | 3.4±0.3                |

## REFERENCES

- 1 Y. Nishimura, J. Chung, H. Muradyan and Z. Guan, *J. Am. Chem. Soc.*, 2017, **139**, 14881-14884.
- 2 M. Capelot, M. M. Unterlass, F. Tournilhac and L. Leibler, *ACS Macro Lett.*, 2012, **1**, 789-792.
